# Supplementary material for: Orosensory Perception of Fat/Sweet Stimuli and Appetite-Regulating Peptides before and after Sleeve Gastrectomy or Gastric Bypass in Adult Women with Obesity
Source: PubMed Central journal article supplement (PMC8000537; doi:10.3390/nu13030878), 2021-03-08
Supplement: nutrients-13-00878-s001.pdf [file nutrients-13-00878-s001.pdf]

Table 1-S. Relationships between appetite-regulating hormones changes after a test meal and LA or sucrose perception thresholds in the whole cohort (VSG+RYGB) before (pre-op) and after (post-op) surgery

|               | Pre-op LA thresholds  |       | Pre-op sucrose thresholds  |       |
|---------------|-----------------------|-------|----------------------------|-------|
|               | R                     | p     | R                          | p     |
| t-AUC GLP-1   | 0.112                 | 0.439 | -0.071                     | 0.651 |
| t-AUC Insulin | -0.083                | 0.595 | -0.138                     | 0.376 |
| t-AUC PYY     | 0.285                 | 0.074 | -0.183                     | 0.257 |
| t-AUC Ghrelin | -0.020                | 0.901 | -0.275                     | 0.086 |
| t-30 GLP-1    | 0.103                 | 0.515 | -0.102                     | 0.519 |
| t-30 Insulin  | -0.103                | 0.509 | -0.077                     | 0.620 |
| t-30 PYY      | 0.307                 | 0.054 | -0.104                     | 0.522 |
| t-30 Ghrelin  | 0.005                 | 0.976 | -0.282                     | 0.077 |
|               | Post-op LA thresholds |       | Post-op sucrose thresholds |       |
|               | R                     | p     | R                          | p     |
| t-AUC GLP-1   | 0.116                 | 0.486 | 0.317                      | 0.052 |
| t-AUC Insulin | -0.108                | 0.504 | 0.216                      | 0.180 |
| t-AUC PYY     | 0.111                 | 0.493 | 0.094                      | 0.562 |
| t-AUC Ghrelin | 0.020                 | 0.905 | 0.025                      | 0.879 |
| t-30 GLP-1    | 0.104                 | 0.526 | 0.334                      | 0.037 |
| t-30 Insulin  | -0.146                | 0.355 | 0.234                      | 0.135 |
| t-30 PYY      | 0.087                 | 0.619 | 0.099                      | 0.543 |
| t-30 Ghrelin  | 0.064                 | 0.626 | 0.060                      | 0.717 |

Spearman correlations. LA, Linoleic acid; t-AUC, total area under the curve; t-30, peak value 30 minutes after the test meal; GLP-1, glucagon like peptide 1; PYY, peptide YY.

Table 2-S. Appetite-regulating hormones changes in subjects with improved or not improved fat and/or sweet taste perception thresholds.

**Whole cohort (VSG+RYGB)**

| LA thresholds      | Improved (n =22)  | Not improved (n =22) | p      |
|--------------------|-------------------|----------------------|--------|
| GLP-1 AUC ratio    | 7.96 ± 10.79      | 8.89 ± 9.96          | 0.7931 |
| Insulin AUC ratio  | 1.35 ± 0.67       | 0.85 ± 0.49          | 0.0112 |
| PYY AUC ratio      | 3.06 ± 1.80       | 3.58 ± 2.17          | 0.4368 |
| Ghrelin AUC ratio  | 0.59 ± 0.53       | 0.90 ± 1.33          | 0.3841 |
| Sucrose thresholds | Improved (n = 20) | Not improved (n =24) | p      |
| GLP-1 AUC ratio    | 10.08 ±12.52      | 7.41 ± 8.72          | 0.4481 |
| Insulin AUC ratio  | 1.06 ± 0.67       | 1.12 ± 0.60          | 0.7970 |
| PYY AUC ratio      | 3.32 ± 2.17       | 3.36 ± 1.93          | 0.9527 |
| Ghrelin AUC ratio  | 0.72 ± 0.49       | 0.79 ± 1.30          | 0.8389 |

**RYGB**

| LA threshold      | Improved (n =7)  | Not improved (n =5) | p      |
|-------------------|------------------|---------------------|--------|
| GLP-1 AUC ratio   | 12.99 ± 15.89    | 11.53 ± 10.69       | 0.8745 |
| Insulin AUC ratio | 1.71 ± 0.66      | 0.90 ± 0.80         | 0.1011 |
| PYY AUC ratio     | 3.20 ± 1.69      | 5.90 ± 3.28         | 0.0992 |
| Ghrelin AUC ratio | 1.11 ± 0.38      | 2.87 ± 2.27         | 0.0671 |
| S threshold       | Improved (n = 6) | Not improved (n =6) | p      |
| GLP-1 AUC ratio   | 14.42 ± 16.81    | 10.11 ± 10.60       | 0.6282 |
| Insulin AUC ratio | 1.53 ± 0.85      | 11.29 ± 0.78        | 0.6311 |
| PYY AUC ratio     | 3.82 ± 2.75      | 4.61 ± 2.67         | 0.6453 |
| Ghrelin AUC ratio | 1.19 ± 0.40      | 2.42 ± 0.2.19       | 0.2049 |

**VSG**

| LA threshold      | Improved (n =15)  | Not improved (n =17) | p      |
|-------------------|-------------------|----------------------|--------|
| GLP-1 AUC ratio   | 4.75 ± 4.16       | 8.14 ± 10.03         | 0.3027 |
| Insulin AUC ratio | 1.14 ± 0.60       | 0.84 ± 0.41          | 0.1319 |
| PYY AUC ratio     | 2.96 ± 1.95       | 3.03 ± 1.48          | 0.9208 |
| Ghrelin AUC ratio | 0.23 ± 0.21       | 0.43 ± 0.23          | 0.0304 |
| S threshold       | Improved (n = 12) | Not improved (n =20) | p      |
| GLP-1 AUC ratio   | 6.83 ± 8.26       | 6.65 ± 8.32          | 0.9603 |
| Insulin AUC ratio | 0.81 ± 0.40       | 1.07 ± 0.56          | 0.1969 |
| PYY AUC ratio     | 2.98 ± 1.80       | 3.01 ± 1.60          | 0.9656 |
| Ghrelin AUC ratio | 0.40 ± 0.22       | 0..34 ± 0.25         | 0.1996 |

Changes in the hormonal response to the test meal are expressed as the ratio of post-operative to pre-operative values of area under the curve (AUC). Means±SD. LA, linoleic acid; GLP-1, glucagon like peptide 1; PYY, peptide YY.
